# Supplementary material for: Genome-Wide Association Study of Genetic Control of Seed Fatty Acid Biosynthesis in Brassica napus
Source: Front Plant Sci. 2017 Jan 20;7:2062. doi: 10.3389/fpls.2016.02062 (PMC5247464; doi:10.3389/fpls.2016.02062)
Supplement: Supplementary file 4 [file Table4.XLSX]

## Sheet: Phenotypic data GAPIT
	SNP genotypes						phenotypes
taxa	UQSNP0001374	UQSNP0001565	UQSNP0001673	UQSNP0001679	UQSNP0001759	UQSNP0001827	palmitic.mean	stearic.mean	oleic.mean	linoleic.mean	linolenic.mean	eikozenoic.mean	seed yield individual
KG1.1	B	B	B	B		B	4.375	2.375	74.92	11.65	5.25	1.425	10.16
KG2.3	B	A		A	A	A	4.1	2.067	80.63	6.6	5.1	1.433	12.88
KG3.6	A	A		A	A	A	3.867	1.467	77.83	8.03	7.2	1.633	12.2
KG4.7	B	B	B	B		B	4.933	2	70.47	14.17	7.067	1.367	11.34
KG5.8	B	B		B	B	B	4.75	1.55	69.7	15.65	6.75	1.6	5.64
KG6.9	B	B	B	B		A	4.075	1.925	72.4	14.18	6.125	1.325	10.4
KG7.10		B	B	B		B	5.15	1.375	64.38	16.5	11.025	1.6	2.26
KG8.11	B	B		B		B	4.65	2.25	73.15	13.15	5.2	1.65	2.32
KG9.12	B	B	B	B		B	5.45	2.25	69.05	15.6	6.3	1.35	2.92
KG10.13	A	A		B		A	4.425	1.75	79.42	7.7	5.25	1.375	13.06
KG11.14	A	A		B	A	A	4.05	1.325	75.75	8.55	8.75	1.55	15.36
KG12.15	B	B		B		B	4.125	2.9	74.9	11.03	5.575	1.5	11.88
KG13.16	B	B		B	B	B	4.433	1.4	69.37	15.6	7.6	1.6	3.62
KG14.17	B	B	B	B		B	4.25	1.775	71.05	14.85	6.775	1.3	10.42
KG15.18	B	B		A		A	4.65	1.65	75.8	9.05	7.15	1.65	10.58
KG16.19	B	B		B			4.6	2.433	71.8	12.4	7.3	1.467	2.02
KG17.22	B	B	B	B		B	5.125	1.45	66.83	16.55	8.5	1.575	5.58
KG18.23	B	B		B			4.9	2.925	73.22	13.07	4.75	1.1	14.92
KG19.24	B	B	B	B		B	4.325	1.975	71.03	13.93	7.175	1.6	11.6
KG20.25	A	A		B		A	3.7	1.45	79.4	7	7.1	1.4	8.76
KG21.26	B	B		B	B	B	3.975	1.95	75.65	10.97	5.925	1.55	6.04
KG22.27	B	B	B	B	B	B	3.925	1.85	71.52	14.28	7.025	1.45	15.66
KG23.28	B	B	B	B		B	4.225	2.175	72.03	13.78	6.325	1.45	10.66
KG24.30	B	B	B	B	B	B	4.775	1.8	72.33	13.75	5.775	1.55	2.86
KG25.32	B	A		A		A	5.4	1.033	69.17	10.83	12.033	1.567	6.12
KG26.33	B	B	B	B	B	B	4.933	2.167	68.5	16.93	6.1	1.3	6.24
KG27.34	A	A	A	A	A	A	5.4	1.675	65.28	17.77	8.45	1.475	2.82
KG28.35	B	A	A	B	A	B	3.9	1.1	77.03	8.23	8.1	1.6	9.18
KG29.36	B	B	B	A	B	B	4.167	1.8	78.6	8.27	5.733	1.467	7.18
KG30.37	B	B	B	B	B	B	4.65	1.875	66.42	18.12	7.575	1.35	7.64
KG31.38	B	B	B	B	B	B	4.65	2.325	71.88	13.8	5.85	1.525	14.04
KG32.40	B	B	B	B	B	B	4.367	1.333	68.6	15.83	8.3	1.533	17.46
KG33.41	B	B	B	B	B	B	4.4	1.275	66.25	17.9	8.775	1.425	11.3
KG34.42	B	B	B	B			4.5	1.967	72.87	13.97	5.333	1.4	8.44
KG35.43	B	B	B	B	B	B	4.55	1.525	68.6	15.7	8.2	1.45	11.72
KG36.45	B	B			B	B	4.467	2.7	68.2	15.5	7.767	1.367	5.18
KG37.46	B	B		B		B	4.8	2.133	68.83	15.57	7.267	1.467	9.1
KG38.48			A	B			4.05	2	73.65	12.35	6.45	1.45	12.8
KG39.50	B	B	A	B	B	A	3.9	1.7	78.42	8.18	6.2	1.65	18.86
KG40.52	B	B	B	B	B	B	4.475	2.025	72.9	13.58	5.675	1.375	16.22
KG41.53	B	B	B	B	B	A	4.475	1.5	69.02	15	8.525	1.425	9.12
KG42.54	B	B	B	B	B		4.867	2.267	71.3	14.67	5.7	1.2	19.18
KG43.55	A	A	B	B		A	5	2.2	70.63	14.37	6.333	1.4	5.18
KG44.56	B	A		B		A	3.95	2.15	79.78	6.8	5.875	1.475	13.4
KG45.58		B				B	5.375	1.525	64.42	18.53	8.625	1.525	5.66
KG46.59	B	B		B	B		5.525	1.975	66.5	16.82	7.75	1.45	6.58
KG47.60	A	B		B	B	A	5.067	1.333	61.67	20.3	10.2	1.467	3.6
KG48.61	B	B	B	B		A	4.425	1.65	74.3	8.82	9.3	1.5	9.6
KG49.62	B	B	B	B	B	B	5.125	1.9	71.3	13.9	6.425	1.425	7.14
KG50.63				B	B	B	4.55	2.175	69.52	14.97	7.375	1.4	11.14
KG51.64	A	A	B	A		A	4.25	1.475	78.53	7.35	6.55	1.75	12.26
KG52.65	A	A		B		A	5.25	1.625	65.53	17.23	8.9	1.5	8.1
KG53.66	B	B		B	B	A	5.633	1.267	65.93	17.07	8.533	1.533	1.62
KG54.67	B	B		B	B	B	4.267	1.733	71.03	14.87	6.7	1.433	6.28
KG55.68	A	B		B		B	4.1	1.6	67.47	16.83	8.7	1.367	10.8
KG56.71	B	B		B		A	4.167	1.7	80.17	7.3	5.233	1.433	11.1
KG57.72	B	A	B	B	B	B	3.967	1.533	76.5	7.67	8.467	1.833	6.02
KG58.73	B	B		B		B	4.775	1.975	69.83	14.6	7.325	1.5	4.92
KG59.75	B	B	B	B	B	B	5.967	1.667	62.27	19.2	9.5	1.4	2.6
KG60.78	B	B		A		A	4.25	1.9	72.55	13.55	6.4	1.3	14.56
KG61.79	B	B	B	B			4.375	2.375	74.92	11.65	5.25	1.425	10.16
KG62.80	A	A	A	A		A	3.867	1.467	77.83	8.03	7.2	1.633	12.2
KG63.81	B	B		B	B	B	4.775	1.8	72.33	13.75	5.775	1.55	2.86
KG64.82	B	A	A	A		B	5.4	1.675	65.28	17.77	8.45	1.475	2.82
KG65.83	B	B		B	B	B	4.075	1.925	72.4	14.18	6.125	1.325	10.4
KG66.84		B		B			5.15	1.375	64.38	16.5	11.025	1.6	2.26
KG67.85						B	4.325	1.975	71.03	13.93	7.175	1.6	11.6
KG68.86		B					4.65	2.325	71.88	13.8	5.85	1.525	14.04
KG69_324 (P1)	B	B	B	B	B	B	4.18	1.4	73.87	9.55	9.33	1.63	15.36
KG70_622 (P2)	A	A	A	A	A	A	4.45	1.587	71.15	14.5	6.975	1.35	10.2

## Sheet: Sheet2
Line ID	palmitic	stearic	oleic	linoleic	linolenic	eikoz
